# Supplementary material for: Evidence for a trophic cascade on rocky reefs following sea star mass mortality in British Columbia
Source: PeerJ. 2016 Apr 26;4:e1980. doi: 10.7717/peerj.1980 (PMC4860306; doi:10.7717/peerj.1980)
Supplement: Data S1 [file peerj-04-1980-s001.xlsx]

## Sheet: HS_Sites.csv
date	year	month	day	season	area	location	site	protection.type	year.protected	lat.n	Lat	long.w	Lon	depth	datum_depth	tide_feet	actual_depth	vis
7/17/2010	2010	7	17	spring	HS	PASSCN	PASSCN22	control		49.19.807	49.3301	123.15.732	-123.262	S	35	13	48
9/2/2010	2010	9	2	fall	HS	PASSCN	PASSCN24	control		49.20.230	49.3372	123.16.212	-123.27	D	50	11	61
8/28/2010	2010	8	28	fall	HS	PASS	PASS3	rca	2007	49.21.468	49.3578	123.17.108	-123.285	D	50	10	60	32
7/15/2010	2010	7	15	spring	HS	PASS	PASS1	rca	2007	49.21.860	49.3643	123.17.373	-123.29	D	45	12	57	16
10/4/2009	2009	10	4	fall	HS	BICN	BICN3	control		49.24.707	49.4118	123.14.527	-123.242	S	25	9	34	19
9/27/2009	2009	9	27	fall	HS	BI	BI6	rca	2004	49.25.470	49.4245	123.16.634	-123.277	S	25	13	38
7/1/2009	2009	7	1	spring	HS	BICN	BICN1	control		49.25.480	49.4247	123.14.058	-123.234	D	50	5	55
6/25/2009	2009	6	25	spring	HS	BI	BI4	rca	2004	49.25.702	49.4284	123.15.762	-123.263	D	45	12	57	23
8/30/2010	2010	8	30	fall	HS	TWBCN	TWBCN3	control		49.26.566	49.4428	123.22.373	-123.373	S	25	10	35
10/9/2009	2009	10	9	fall	HS	LB	LB5	rca	2007	49.27.009	49.4502	123.14.495	-123.242	D	45	13	58	17
7/18/2010	2010	7	18	spring	HS	TWBCN	TWBCN2	control		49.27.205	49.4534	123.21.760	-123.363	S	25	13	38
6/29/2009	2009	6	29	spring	HS	LB	LB2	rca	2007	49.27.869	49.4645	123.14.431	-123.241	S	25	11	36	15
7/20/2010	2010	7	20	spring	HS	TWB	TWB1	rca	2007	49.28.541	49.4757	123.23.045	-123.384	D	45	10	55	27
8/30/2001	2010	8	30	fall	HS	TWB	TWB2	rca	2007	49.28.647	49.4774	123.22.946	-123.382	D	50	12	62	41
7/2/2009	2009	7	2	spring	HS	PRCN	PRCN5	control		49.29.750	49.4958	123.19.735	-123.329	D	50	9	59	29
10/4/2009	2009	10	4	fall	HS	LBCN	LBCN3	control		49.29.920	49.4987	123.14.950	-123.249	S	35	8	43
9/26/2009	2009	9	27	fall	HS	PR	PR3	rca	2004	49.29.944	49.4991	123.18.089	-123.301	S	35	13	48
6/23/2009	2009	6	23	spring	HS	LBCN	LBCN2	control		49.30.189	49.5031	123.15.137	-123.252	D	50	1	51
9/25/2009	2009	9	25	fall	HS	PRCN	PRCN6	control		49.30.355	49.5059	123.20.602	-123.343	D	40	11	51
7/3/2009	2009	7	3	spring	HS	PR	PR1	rca	2004	49.30.668	49.5111	123.18.046	-123.301	D	50	3	53	24

## Sheet: transectcounts.csv
ssws	site	transect	california.cucumber	dungeness.crab	green.urchin	grunt.sculpin	longfin.sculpin	misc.crab	octopus	orange.cup.coral	red.rock.crab	red.urchin	sailfin.sculpin	scalyhead.sculpin	sculpin	shrimp	spot.prawn	squat.lobster	sunflower.star	white.urchin
after	BI4	BI4-A	1	0	0	0	1	0	0	7	0	0	0	1	0	15	0	0	0	1
after	BI4	BI4-B	6	0	0	1	5	2	0	11	0	0	0	0	0	6	0	0	0	0
after	BI4	BI4-C	2	0	0	0	2	0	0	5	2	0	0	0	0	3	0	0	0	0
after	BI4	BI4-D	2	0	0	0	9	4	0	15	0	0	0	0	0	5	0	2	0	0
before	BI4	BI4-A	1	0	0	0	0	1	0	1	0	0	0	0	0	77	0	0	0	0
before	BI4	BI4-B	2	0	2	0	0	1	0	0	0	0	0	2	0	16	0	0	0	0
before	BI4	BI4-C	5	0	0	0	0	2	0	0	0	0	1	1	0	11	0	0	0	0
before	BI4	BI4-D	1	0	1	1	0	0	0	0	0	0	0	3	0	33	0	1	0	0
after	BI6	BI6-A	6	0	0	0	1	1	0	12	0	0	0	0	0	8	0	0	0	1
after	BI6	BI6-B	3	0	2	0	1	4	0	16	0	0	0	0	0	1	0	0	0	0
after	BI6	BI6-C	0	0	83	0	0	1	0	7	0	0	0	0	0	0	0	0	0	0
after	BI6	BI6-D	0	0	575	0	1	1	0	0	0	0	0	0	1	0	0	0	0	0
before	BI6	BI6-A	1	0	17	0	0	0	0	2	0	1	0	0	2	0	0	0	0	0
before	BI6	BI6-B	0	0	84	0	0	2	0	0	0	0	0	0	6	2	0	0	0	0
before	BI6	BI6-C	0	0	11	0	0	0	0	0	0	2	0	0	0	1	0	0	0	0
before	BI6	BI6-D	3	0	61	0	1	1	0	0	0	0	0	0	0	0	0	0	0	0
after	BICN1	BICN1-A	0	0	0	0	0	0	0	5	0	0	0	1	0	3	0	1	0	0
after	BICN1	BICN1-B	4	0	0	0	2	2	0	8	0	0	0	0	0	12	0	0	0	0
after	BICN1	BICN1-C	2	0	0	0	0	2	0	3	0	0	0	0	0	5	0	0	0	0
after	BICN1	BICN1-D	5	0	0	0	0	1	0	0	0	0	0	0	0	0	0	0	0	0
before	BICN1	BICN1-A	2	0	0	0	0	6	0	15	0	0	0	0	0	13	0	4	1	1
before	BICN1	BICN1-B	2	0	0	0	0	3	0	0	0	0	0	0	2	6	0	0	1	0
before	BICN1	BICN1-C	0	0	0	0	0	0	0	0	0	0	0	0	0	1	0	1	2	0
before	BICN1	BICN1-D	0	0	0	0	0	5	0	0	0	0	0	0	1	14	0	0	2	0
after	BICN3	BICN3-A	2	0	0	0	0	2	0	14	0	0	0	1	2	4	0	0	0	0
after	BICN3	BICN3-B	5	0	0	0	0	1	0	18	0	0	0	0	0	9	0	0	0	0
after	BICN3	BICN3-C	2	0	0	0	1	0	0	2	0	0	0	0	2	1	0	0	0	0
after	BICN3	BICN3-D	2	0	0	0	0	0	0	0	2	0	0	0	0	7	0	0	0	0
before	BICN3	BICN3-A	1	0	0	0	0	0	0	12	0	0	0	0	0	3	0	1	0	0
before	BICN3	BICN3-B	0	0	1	0	0	0	0	0	0	0	0	0	0	0	0	0	0	0
before	BICN3	BICN3-C	0	0	0	0	0	2	0	0	0	0	0	0	0	1	0	0	0	0
before	BICN3	BICN3-D	0	0	0	0	0	1	0	0	0	0	0	0	0	0	0	0	1	4
after	LB2	LB2-A	2	0	0	0	0	2	0	0	0	0	0	0	0	12	0	0	0	0
after	LB2	LB2-B	3	0	0	0	0	0	0	0	0	0	0	1	0	4	0	0	0	0
after	LB2	LB2-C	4	0	13	0	0	2	0	0	0	0	0	0	0	0	0	0	0	0
after	LB2	LB2-D	4	0	0	0	1	0	0	0	0	0	0	0	0	4	0	0	0	0
before	LB2	LB2-A	3	0	0	0	0	1	0	0	0	0	0	0	0	64	1	13	0	0
before	LB2	LB2-B	7	0	1	0	0	1	0	0	0	0	0	4	3	10	0	0	3	0
before	LB2	LB2-C	1	0	6	0	0	2	0	0	0	0	0	0	2	12	1	3	0	0
before	LB2	LB2-D	2	0	2	0	0	9	1	0	0	0	0	0	4	12	0	0	4	0
after	LB5	LB5-A	16	0	6	0	0	3	0	7	0	0	0	0	0	2	0	0	0	0
after	LB5	LB5-B	6	0	3	0	2	2	0	1	0	0	0	0	0	2	0	0	0	0
after	LB5	LB5-C	1	0	0	0	0	0	0	0	0	0	0	0	0	1	0	0	0	0
after	LB5	LB5-D	3	0	2	0	4	6	0	13	0	0	0	0	0	2	0	0	1	0
before	LB5	LB5-A	4	0	0	0	0	2	0	4	0	3	0	0	0	1	0	0	0	0
before	LB5	LB5-B	2	0	7	0	0	1	0	0	0	0	0	0	1	2	0	0	0	0
before	LB5	LB5-C	0	0	1	0	1	0	0	43	0	0	0	0	0	1	0	0	1	5
before	LB5	LB5-D	1	0	4	0	0	2	0	23	0	0	0	1	0	1	0	0	0	1
after	LBCN2	LBCN2-A	0	0	1	0	0	0	0	0	0	0	0	1	0	4	0	0	0	1
after	LBCN2	LBCN2-B	1	0	2	0	0	0	0	5	0	0	0	0	0	3	0	0	0	0
after	LBCN2	LBCN2-C	2	0	46	0	0	0	0	0	0	0	0	0	0	0	0	0	0	0
after	LBCN2	LBCN2-D	14	0	48	0	0	1	0	0	0	0	0	0	0	0	0	0	0	0
before	LBCN2	LBCN2-A	12	0	0	0	0	1	0	13	0	0	0	0	0	20	0	0	0	0
before	LBCN2	LBCN2-B	3	1	8	0	0	13	0	0	0	0	0	0	1	0	0	0	1	0
before	LBCN2	LBCN2-C	19	0	0	0	0	1	0	2	0	0	0	1	0	9	1	1	0	0
before	LBCN2	LBCN2-D	6	0	4	0	0	0	0	0	0	0	0	0	1	0	0	35	4	0
after	LBCN3	LBCN3-A	5	0	25	0	5	1	0	24	0	0	0	1	0	1	0	0	0	1
after	LBCN3	LBCN3-B	0	0	47	0	1	1	0	0	0	0	0	0	0	0	0	0	0	0
after	LBCN3	LBCN3-C	8	0	1	0	3	2	0	0	0	0	0	0	0	6	0	0	0	0
after	LBCN3	LBCN3-D	6	0	1	0	0	1	0	2	0	0	0	0	0	1	0	0	0	0
before	LBCN3	LBCN3-A	4	0	4	0	0	0	0	0	0	0	0	0	0	2	0	1	0	0
before	LBCN3	LBCN3-B	8	0	4	0	0	0	0	0	0	0	0	0	2	0	0	0	0	0
before	LBCN3	LBCN3-C	0	0	0	0	0	0	0	0	0	0	0	0	0	9	0	14	0	0
before	LBCN3	LBCN3-D	1	0	4	0	0	0	0	0	0	0	0	0	0	7	4	1	0	0
after	PASS1	PASS1-A	0	0	14	0	1	3	0	12	0	0	0	0	0	0	0	0	0	0
after	PASS1	PASS1-B	0	0	101	0	0	55	0	0	0	0	0	0	1	0	0	0	0	0
after	PASS1	PASS1-C	2	0	5	0	0	1	0	43	0	0	0	0	0	4	0	0	0	0
after	PASS1	PASS1-D	6	0	11	0	0	0	0	0	0	0	0	0	0	0	0	0	0	0
before	PASS1	PASS1-A	1	0	17	0	0	6	0	0	0	0	0	0	0	5	0	0	1	0
before	PASS1	PASS1-B	1	0	10	0	0	31	0	0	0	0	0	0	10	6	0	0	1	0
before	PASS1	PASS1-C	0	0	15	0	0	5	0	0	0	0	0	0	2	2	0	0	0	0
before	PASS1	PASS1-D	0	0	34	0	0	8	0	0	0	0	0	0	1	3	0	0	0	0
after	PASS3	PASS3-A	1	0	9	0	0	25	0	6	0	0	0	1	2	10	0	0	0	0
after	PASS3	PASS3-B	7	0	67	0	0	8	0	0	0	0	0	0	0	1	0	0	0	0
after	PASS3	PASS3-C	6	0	1	0	0	9	0	0	0	0	0	1	0	1	0	0	0	0
after	PASS3	PASS3-D	11	0	18	0	0	15	0	0	0	0	0	4	0	0	0	0	0	0
before	PASS3	PASS3-A	0	0	0	0	0	5	0	0	0	0	0	0	1	5	0	0	0	0
before	PASS3	PASS3-B	0	0	2	0	0	18	0	0	0	0	0	0	2	3	0	0	3	3
before	PASS3	PASS3-C	0	0	0	0	0	5	0	0	0	0	0	0	3	14	0	0	2	0
before	PASS3	PASS3-D	0	0	0	0	0	14	0	0	0	0	0	0	8	11	0	0	1	2
after	PASSCN22	PASSCN22-A	0	0	0	0	0	10	0	11	0	0	0	0	0	5	0	0	0	0
after	PASSCN22	PASSCN22-B	0	0	25	0	0	25	0	0	0	2	0	6	0	0	0	0	0	0
after	PASSCN22	PASSCN22-C	2	0	1	0	0	13	0	0	0	0	0	1	0	2	0	0	0	0
after	PASSCN22	PASSCN22-D	5	0	26	0	0	39	0	0	1	0	0	1	0	1	0	0	0	0
before	PASSCN22	PASSCN22-A	0	0	0	0	0	8	0	0	0	1	0	0	0	7	0	0	1	0
before	PASSCN22	PASSCN22-B	1	0	1	0	0	10	0	0	0	0	0	0	3	4	0	0	10	0
before	PASSCN22	PASSCN22-C	0	0	1	0	0	30	0	0	0	0	0	0	4	14	0	0	0	0
before	PASSCN22	PASSCN22-D	0	0	3	0	0	25	0	0	0	0	0	0	6	21	0	0	0	0
after	PASSCN24	PASSCN24-A	0	0	0	0	0	5	0	1	1	1	0	0	0	23	0	0	0	0
after	PASSCN24	PASSCN24-B	3	0	1	0	4	7	0	0	0	0	0	0	0	0	0	0	0	0
after	PASSCN24	PASSCN24-C	0	0	1	0	0	7	0	0	0	0	0	0	0	0	0	0	0	0
after	PASSCN24	PASSCN24-D	2	0	13	0	0	8	0	0	0	0	0	0	0	2	0	0	0	0
before	PASSCN24	PASSCN24-A	0	0	0	0	0	29	0	0	0	0	0	0	1	1	0	0	0	0
before	PASSCN24	PASSCN24-B	1	0	0	0	0	41	0	0	0	0	0	0	1	7	0	0	0	0
before	PASSCN24	PASSCN24-C	2	0	0	0	0	65	0	0	0	0	0	0	1	27	0	0	1	0
before	PASSCN24	PASSCN24-D	0	0	0	0	0	11	0	0	0	0	0	0	0	0	0	0	2	0
after	PR1	PR1-A	0	0	0	0	0	2	0	7	0	0	0	0	0	3	0	0	0	0
after	PR1	PR1-B	6	0	0	0	1	4	0	13	0	0	0	0	0	1	0	0	0	0
after	PR1	PR1-C	3	0	0	0	0	0	0	15	0	0	0	0	0	0	0	1	0	0
after	PR1	PR1-D	2	0	0	0	1	2	0	3	0	0	0	0	0	4	0	0	0	0
before	PR1	PR1-A	1	0	0	0	0	0	0	0	0	0	0	0	0	16	0	0	0	0
before	PR1	PR1-B	0	0	0	0	0	0	0	2	0	0	0	0	0	0	1	2	50	0
before	PR1	PR1-C	7	0	1	0	0	2	0	2	0	0	0	2	0	17	0	0	0	0
before	PR1	PR1-D	3	0	0	0	0	2	0	0	0	0	0	0	7	18	0	0	0	4
after	PR3	PR3-A	0	0	1	0	0	2	0	0	0	0	0	0	2	3	0	1	0	0
after	PR3	PR3-B	1	0	8	0	2	1	0	3	0	1	0	2	0	23	0	0	0	0
after	PR3	PR3-C	2	0	4	0	0	2	0	10	0	0	0	2	0	5	0	0	0	0
after	PR3	PR3-D	0	0	1	0	0	0	0	0	0	0	0	1	0	4	2	0	0	0
before	PR3	PR3-A	3	0	47	0	0	2	0	9	0	0	0	1	0	0	0	0	0	0
before	PR3	PR3-B	0	0	0	0	0	0	0	0	0	0	0	0	0	24	0	0	0	0
before	PR3	PR3-C	0	0	0	0	0	1	0	0	0	0	0	0	0	14	0	2	0	0
before	PR3	PR3-D	1	0	0	0	1	0	0	0	0	0	0	0	0	12	17	0	1	0
after	PRCN5	PRCN5-A	1	0	2	0	0	4	0	34	0	0	0	0	2	12	0	0	0	0
after	PRCN5	PRCN5-B	2	0	1	0	0	1	0	17	0	0	0	0	0	5	0	0	0	0
after	PRCN5	PRCN5-C	2	0	10	0	2	1	0	4	0	0	0	1	0	3	0	0	1	0
after	PRCN5	PRCN5-D	1	0	10	0	1	0	0	12	0	0	0	0	1	4	0	0	0	0
before	PRCN5	PRCN5-A	0	0	0	0	0	1	0	0	0	0	0	0	0	4	0	0	2	0
before	PRCN5	PRCN5-B	0	0	0	0	0	1	0	0	0	0	0	0	2	35	6	0	1	0
before	PRCN5	PRCN5-C	0	0	1	0	0	2	0	2	0	0	0	0	0	18	137	0	0	0
before	PRCN5	PRCN5-D	0	0	0	0	0	0	0	0	1	0	0	0	4	4	257	0	3	0
after	PRCN6	PRCN6-A	2	0	2	0	0	1	0	1	0	1	0	0	1	9	0	0	0	0
after	PRCN6	PRCN6-B	5	0	0	0	0	5	0	0	0	0	0	2	0	8	0	0	0	0
after	PRCN6	PRCN6-C	2	0	0	0	0	1	0	0	0	0	0	1	0	7	3	0	0	0
after	PRCN6	PRCN6-D	0	0	1	0	0	0	0	10	0	0	0	0	0	20	0	0	0	0
before	PRCN6	PRCN6-A	0	0	0	0	0	0	0	0	0	0	0	0	0	57	0	0	0	0
before	PRCN6	PRCN6-B	2	0	0	0	0	7	0	0	0	0	0	1	0	42	17	0	0	1
before	PRCN6	PRCN6-C	0	0	0	0	0	3	0	3	0	0	0	0	2	2	0	0	1	0
before	PRCN6	PRCN6-D	1	0	0	0	0	3	0	0	0	0	0	0	1	6	0	0	0	0
after	TWB1	TWB1-A	0	0	0	0	0	0	0	1	0	0	0	0	0	0	0	0	0	0
after	TWB1	TWB1-B	3	0	0	0	0	0	0	0	0	0	0	0	0	0	0	0	0	0
after	TWB1	TWB1-C	0	0	0	0	0	2	0	2	1	0	0	0	0	4	0	0	0	0
after	TWB1	TWB1-D	4	0	1	0	0	1	0	0	0	0	0	0	0	0	0	0	0	1
before	TWB1	TWB1-A	0	0	0	0	0	0	0	0	0	0	0	0	0	0	0	0	0	0
before	TWB1	TWB1-B	0	0	0	0	0	0	0	0	0	0	0	0	4	1	0	0	2	0
before	TWB1	TWB1-C	2	0	0	0	0	0	0	0	0	0	0	0	0	1	0	1	0	0
before	TWB1	TWB1-D	1	0	0	0	0	0	0	0	0	0	0	0	1	3	0	0	1	0
after	TWB2	TWB2-A	1	0	0	0	0	0	0	0	0	0	0	0	0	0	0	0	0	0
after	TWB2	TWB2-B	1	0	0	0	0	0	0	0	0	0	0	0	0	0	0	0	0	0
after	TWB2	TWB2-C	3	0	0	0	2	0	0	0	0	0	0	0	0	0	0	0	0	0
after	TWB2	TWB2-D	5	0	0	0	1	0	0	0	0	0	0	0	0	5	0	0	0	0
before	TWB2	TWB2-A	0	0	0	0	0	0	0	0	0	0	0	0	2	0	0	0	0	0
before	TWB2	TWB2-B	1	0	0	0	0	0	0	0	1	0	0	0	0	0	0	0	2	0
before	TWB2	TWB2-C	0	0	0	0	0	0	0	0	0	0	0	0	0	2	0	0	0	0
before	TWB2	TWB2-D	0	0	0	0	0	0	0	0	0	0	0	0	0	1	0	0	0	0
after	TWBCN2	TWBCN2-A	13	0	0	0	0	10	0	14	0	0	0	0	0	10	0	0	0	0
after	TWBCN2	TWBCN2-B	11	0	294	0	0	4	0	0	0	0	0	0	0	0	0	0	14	0
after	TWBCN2	TWBCN2-C	9	0	11	0	0	1	0	7	0	0	0	2	0	1	0	0	0	0
after	TWBCN2	TWBCN2-D	8	0	25	0	0	1	0	3	0	0	0	1	0	0	0	0	1	0
before	TWBCN2	TWBCN2-A	0	0	0	0	0	7	0	0	0	0	0	0	0	0	0	0	1	0
before	TWBCN2	TWBCN2-B	0	0	0	0	0	2	0	0	0	0	0	0	6	0	0	0	18	0
before	TWBCN2	TWBCN2-C	3	0	3	0	0	7	0	0	0	0	0	0	2	5	0	0	2	0
before	TWBCN2	TWBCN2-D	0	0	1	0	0	2	0	0	0	0	0	0	2	0	0	0	0	0
after	TWBCN3	TWBCN3-A	0	0	16	0	0	2	0	8	0	0	0	0	0	0	0	0	0	0
after	TWBCN3	TWBCN3-B	3	0	0	0	0	0	0	0	0	0	0	0	0	0	0	0	0	0
after	TWBCN3	TWBCN3-C	3	0	8	0	0	6	0	30	0	0	0	0	0	13	0	0	0	0
after	TWBCN3	TWBCN3-D	6	0	1	0	0	1	0	0	0	0	0	3	0	2	0	0	0	0
before	TWBCN3	TWBCN3-A	0	0	4	0	0	4	0	0	0	0	0	0	0	0	0	0	0	0
before	TWBCN3	TWBCN3-B	0	0	1	0	0	6	0	0	0	0	0	0	4	0	0	0	0	0
before	TWBCN3	TWBCN3-C	0	0	2	0	0	1	0	0	0	0	0	0	2	0	0	0	0	0
before	TWBCN3	TWBCN3-D	0	0	0	0	0	12	0	0	0	0	0	0	3	0	0	0	1	0

## Sheet: kelpbytransect.csv
site	transect	percent.cover	mortality
BI4	BI4-A	0	Before
BI4	BI4-B	0	Before
BI4	BI4-C	0	Before
BI4	BI4-D	0	Before
BI6	BI6-A	3	Before
BI6	BI6-B	8.53684	Before
BI6	BI6-C	0.0645161	Before
BI6	BI6-D	1.87671	Before
BICN1	BICN1-A	0	Before
BICN1	BICN1-B	0	Before
BICN1	BICN1-C	0	Before
BICN1	BICN1-D	0	Before
BICN3	BICN3-A	0	Before
BICN3	BICN3-B	6.53333	Before
BICN3	BICN3-C	0	Before
BICN3	BICN3-D	2.64706	Before
LB2	LB2-A	0	Before
LB2	LB2-B	0	Before
LB2	LB2-C	0	Before
LB2	LB2-D	0	Before
LB5	LB5-A	0	Before
LB5	LB5-B	6.72727	Before
LB5	LB5-C	0	Before
LB5	LB5-D	0	Before
LBCN2	LBCN2-A	0	Before
LBCN2	LBCN2-B	0	Before
LBCN2	LBCN2-C	0	Before
LBCN2	LBCN2-D	0	Before
LBCN3	LBCN3-A	0.176471	Before
LBCN3	LBCN3-B	15.75	Before
LBCN3	LBCN3-C	0	Before
LBCN3	LBCN3-D	4.92	Before
PASS1	PASS1-A	0	Before
PASS1	PASS1-B	0.169492	Before
PASS1	PASS1-C	0	Before
PASS1	PASS1-D	0	Before
PASS3	PASS3-A	0.789474	Before
PASS3	PASS3-B	0	Before
PASS3	PASS3-C	0	Before
PASS3	PASS3-D	0	Before
PASSCN22	PASSCN22-A	0	Before
PASSCN22	PASSCN22-B	0	Before
PASSCN22	PASSCN22-C	1.86538	Before
PASSCN22	PASSCN22-D	0	Before
PASSCN24	PASSCN24-A	0	Before
PASSCN24	PASSCN24-B	0	Before
PASSCN24	PASSCN24-C	0.0309278	Before
PASSCN24	PASSCN24-D	0	Before
PR1	PR1-A	0	Before
PR1	PR1-B	0	Before
PR1	PR1-C	0	Before
PR1	PR1-D	0	Before
PR3	PR3-A	0.227273	Before
PR3	PR3-B	5.87879	Before
PR3	PR3-C	10.25	Before
PR3	PR3-D	58.1944	Before
PRCN5	PRCN5-A	0	Before
PRCN5	PRCN5-B	0	Before
PRCN5	PRCN5-C	0	Before
PRCN5	PRCN5-D	0	Before
PRCN6	PRCN6-A	18.4516	Before
PRCN6	PRCN6-B	39.5833	Before
PRCN6	PRCN6-C	0.157895	Before
PRCN6	PRCN6-D	0.5	Before
TWB1	TWB1-A	0	Before
TWB1	TWB1-B	10.4	Before
TWB1	TWB1-C	5.4	Before
TWB1	TWB1-D	11.25	Before
TWB2	TWB2-A	0	Before
TWB2	TWB2-B	43.9333	Before
TWB2	TWB2-C	0	Before
TWB2	TWB2-D	0	Before
TWBCN2	TWBCN2-A	0	Before
TWBCN2	TWBCN2-B	9.73333	Before
TWBCN2	TWBCN2-C	0.142857	Before
TWBCN2	TWBCN2-D	0.266667	Before
TWBCN3	TWBCN3-A	1.23529	Before
TWBCN3	TWBCN3-B	26.75	Before
TWBCN3	TWBCN3-C	1.47059	Before
TWBCN3	TWBCN3-D	0.238095	Before
BI4	BI4-A	0.117647	After
BI4	BI4-B	0.162162	After
BI4	BI4-C	0	After
BI4	BI4-D	0	After
BI6	BI6-A	0	After
BI6	BI6-B	0	After
BI6	BI6-C	0	After
BI6	BI6-D	0	After
BICN1	BICN1-A	0	After
BICN1	BICN1-B	0	After
BICN1	BICN1-C	0.48	After
BICN1	BICN1-D	3.70833	After
BICN3	BICN3-A	0	After
BICN3	BICN3-B	0	After
BICN3	BICN3-C	0	After
BICN3	BICN3-D	0	After
LB2	LB2-A	0	After
LB2	LB2-B	0.193548	After
LB2	LB2-C	10.7273	After
LB2	LB2-D	3.33333	After
LB5	LB5-A	0	After
LB5	LB5-B	0	After
LB5	LB5-C	0	After
LB5	LB5-D	0	After
LBCN2	LBCN2-A	0	After
LBCN2	LBCN2-B	0	After
LBCN2	LBCN2-C	0	After
LBCN2	LBCN2-D	0.0135135	After
LBCN3	LBCN3-A	0	After
LBCN3	LBCN3-B	0	After
LBCN3	LBCN3-C	0	After
LBCN3	LBCN3-D	0	After
PASS1	PASS1-A	0	After
PASS1	PASS1-B	0	After
PASS1	PASS1-C	0	After
PASS1	PASS1-D	0	After
PASS3	PASS3-A	0	After
PASS3	PASS3-B	0	After
PASS3	PASS3-C	0	After
PASS3	PASS3-D	0	After
PASSCN22	PASSCN22-A	0	After
PASSCN22	PASSCN22-B	0	After
PASSCN22	PASSCN22-C	0.32	After
PASSCN22	PASSCN22-D	0	After
PASSCN24	PASSCN24-A	0	After
PASSCN24	PASSCN24-B	0	After
PASSCN24	PASSCN24-C	0	After
PASSCN24	PASSCN24-D	0	After
PR1	PR1-A	0	After
PR1	PR1-B	0	After
PR1	PR1-C	0	After
PR1	PR1-D	0	After
PR3	PR3-A	1.85185	After
PR3	PR3-B	0	After
PR3	PR3-C	0	After
PR3	PR3-D	14.7576	After
PRCN5	PRCN5-A	0	After
PRCN5	PRCN5-B	0	After
PRCN5	PRCN5-C	0	After
PRCN5	PRCN5-D	0.333333	After
PRCN6	PRCN6-A	0	After
PRCN6	PRCN6-B	0	After
PRCN6	PRCN6-C	3.40909	After
PRCN6	PRCN6-D	0	After
TWB1	TWB1-A	0	After
TWB1	TWB1-B	5.57576	After
TWB1	TWB1-C	0	After
TWB1	TWB1-D	8.25	After
TWB2	TWB2-A	0	After
TWB2	TWB2-B	6.48571	After
TWB2	TWB2-C	0	After
TWB2	TWB2-D	0.577778	After
TWBCN2	TWBCN2-A	0	After
TWBCN2	TWBCN2-B	0	After
TWBCN2	TWBCN2-C	0	After
TWBCN2	TWBCN2-D	0	After
TWBCN3	TWBCN3-A	0	After
TWBCN3	TWBCN3-B	1.44186	After
TWBCN3	TWBCN3-C	0	After
TWBCN3	TWBCN3-D	0	After

## Sheet: abundance3.csv
site.no.bylat	site.no.bydate	site	species	before	after	rd	both0	fill.col
18	1	LBCN2	green.urchin	12	97	1.55963	0	green.urchin
18	1	LBCN2	kelp	0	0.00337838	2	0	kelp
18	1	LBCN2	sunflowe.star	5	0	-2	0	sunflowe.star
8	2	BI4	green.urchin	3	0	-2	0	green.urchin
8	2	BI4	kelp	0	0.0699523	2	0	kelp
8	2	BI4	sunflowe.star	0	0	0	1	blank
12	3	LB2	green.urchin	9	13	0.363636	0	green.urchin
12	3	LB2	kelp	0	3.56354	2	0	kelp
12	3	LB2	sunflowe.star	7	0	-2	0	sunflowe.star
7	4	BICN1	green.urchin	0	0	0	1	blank
7	4	BICN1	kelp	0	1.04708	2	0	kelp
7	4	BICN1	sunflowe.star	6	0	-2	0	sunflowe.star
15	5	PRCN5	green.urchin	1	23	1.83333	0	green.urchin
15	5	PRCN5	kelp	0	0.0833333	2	0	kelp
15	5	PRCN5	sunflowe.star	6	1	-1.42857	0	sunflowe.star
20	6	PR1	green.urchin	1	0	-2	0	green.urchin
20	6	PR1	kelp	0	0	0	1	blank
20	6	PR1	sunflowe.star	50	0	-2	0	sunflowe.star
4	7	PASS1	green.urchin	76	131	0.531401	0	green.urchin
4	7	PASS1	kelp	0.0423729	0	-2	0	kelp
4	7	PASS1	sunflowe.star	2	0	-2	0	sunflowe.star
1	8	PASSCN22	green.urchin	5	52	1.64912	0	green.urchin
1	8	PASSCN22	kelp	0.466346	0.08	-1.41429	0	kelp
1	8	PASSCN22	sunflowe.star	11	0	-2	0	sunflowe.star
11	9	TWBCN2	green.urchin	4	330	1.9521	0	green.urchin
11	9	TWBCN2	kelp	2.53571	0	-2	0	kelp
11	9	TWBCN2	sunflowe.star	21	15	-0.333333	0	sunflowe.star
13	10	TWB1	green.urchin	0	1	2	0	green.urchin
13	10	TWB1	kelp	6.7625	3.45644	-0.647046	0	kelp
13	10	TWB1	sunflowe.star	3	0	-2	0	sunflowe.star
3	11	PASS3	green.urchin	2	95	1.91753	0	green.urchin
3	11	PASS3	kelp	0.197368	0	-2	0	kelp
3	11	PASS3	sunflowe.star	6	0	-2	0	sunflowe.star
14	12	TWB2	green.urchin	0	0	0	1	blank
14	12	TWB2	kelp	10.9833	1.76587	-1.44597	0	kelp
14	12	TWB2	sunflowe.star	2	0	-2	0	sunflowe.star
9	13	TWBCN3	green.urchin	7	25	1.125	0	green.urchin
9	13	TWBCN3	kelp	7.42349	0.360465	-1.81477	0	kelp
9	13	TWBCN3	sunflowe.star	1	0	-2	0	sunflowe.star
2	14	PASSCN24	green.urchin	0	15	2	0	green.urchin
2	14	PASSCN24	kelp	0.00773196	0	-2	0	kelp
2	14	PASSCN24	sunflowe.star	3	0	-2	0	sunflowe.star
19	15	PRCN6	green.urchin	0	3	2	0	green.urchin
19	15	PRCN6	kelp	14.6732	0.852273	-1.78042	0	kelp
19	15	PRCN6	sunflowe.star	1	0	-2	0	sunflowe.star
6	16	BI6	green.urchin	173	660	1.16927	0	green.urchin
6	16	BI6	kelp	3.36952	0	-2	0	kelp
6	16	BI6	sunflowe.star	0	0	0	1	blank
17	17	PR3	green.urchin	47	14	-1.08197	0	green.urchin
17	17	PR3	kelp	18.6376	4.15236	-1.2712	0	kelp
17	17	PR3	sunflowe.star	1	0	-2	0	sunflowe.star
5	18	BICN3	green.urchin	1	0	-2	0	green.urchin
5	18	BICN3	kelp	2.2951	0	-2	0	kelp
5	18	BICN3	sunflowe.star	1	0	-2	0	sunflowe.star
16	19	LBCN3	green.urchin	12	74	1.44186	0	green.urchin
16	19	LBCN3	kelp	5.21162	0	-2	0	kelp
16	19	LBCN3	sunflowe.star	0	0	0	1	blank
10	20	LB5	green.urchin	12	11	-0.0869565	0	green.urchin
10	20	LB5	kelp	1.68182	0	-2	0	kelp
10	20	LB5	sunflowe.star	1	1	0	0	sunflowe.star
